# Supplementary material for: Melatonin-loaded mesoporous zinc- and gallium-doped hydroxyapatite nanoparticles to control infection and bone repair
Source: Royal Society of Chemistry journal article supplement (doi:10.1039/d4bm00377b), 2024-01-01
Supplement: d4bm00377b1.pdf [file d4bm00377b1.pdf]

## Supporting Information

### Melatonin-loaded mesoporous zinc, and gallium-doped hydroxyapatite nanoparticles to control infection and bone repair

Mahshid Shokri, Mahshid Kharaziha\*, Seyed Hossein Ahmadi Tafti, Faezeh Dalili, Rouhollah Mehdiavaz Aghdam, Seyed Reza Ghiassi, Mohamadreza Baghaban Eslaminejad

**Table S1.** The list of gene sequences of the primers

| Gene Name | Reverse Primer (5'–3') | Forward Primer (5'–3') |
|-----------|------------------------|------------------------|
| ALP       | TGGAGACACCCATCCCATCT   | TGGAGCTTCAGAAGCTCAACAC |
| Runx-2    | GGTGTGGTAGTGAGTGGTGG   | TAGGCGCATTTCAGGTGCTT   |
| COL I     | ACCAGACATGCCTCTTGCCTT  | CCTGCGTGTACCCCACTCA    |
| OCN       | TATATCCACTGCCTGAGCGG   | GGCAGCCTCTGATTGTGTCC   |
| GAPDH     | TGATGGGTTTCCCATGATGA   | TGATTCTACCCACGGCAAGTT  |

ALP: alkaline phosphatase, RUNX2: runt-related transcription factor 2, Col I: type I collagen, OCN: osteocalcin

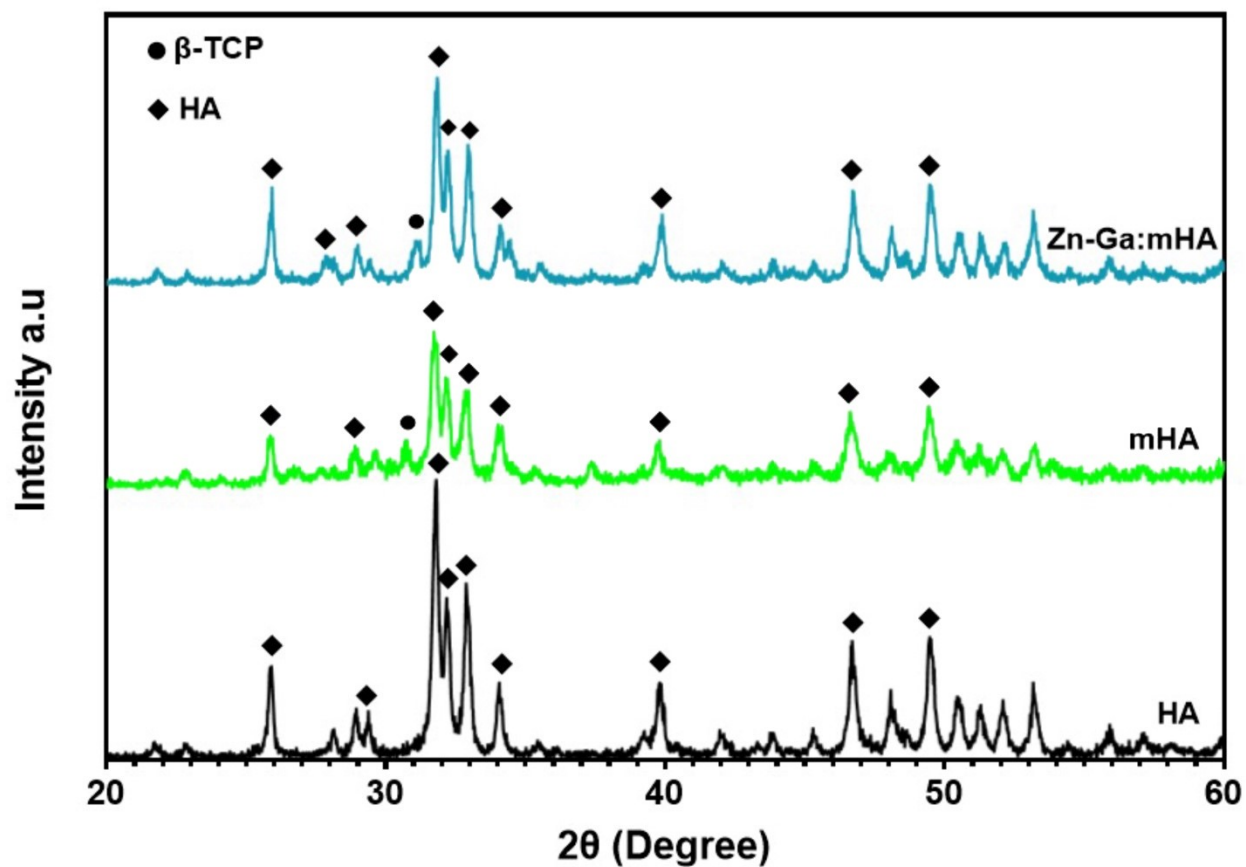

Figure S1. XRD patterns of HA, mHA, and Zn-Ga:mHA nanoparticles.

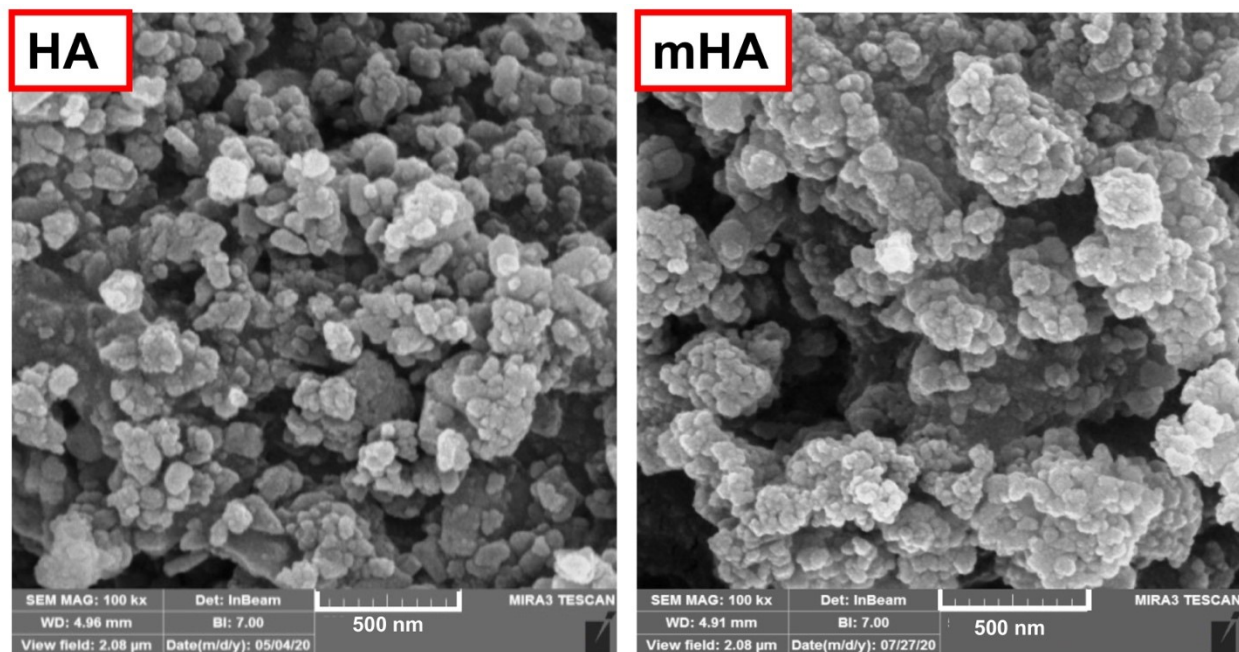

Figure S2. FESEM images of HA and mHA nanoparticles

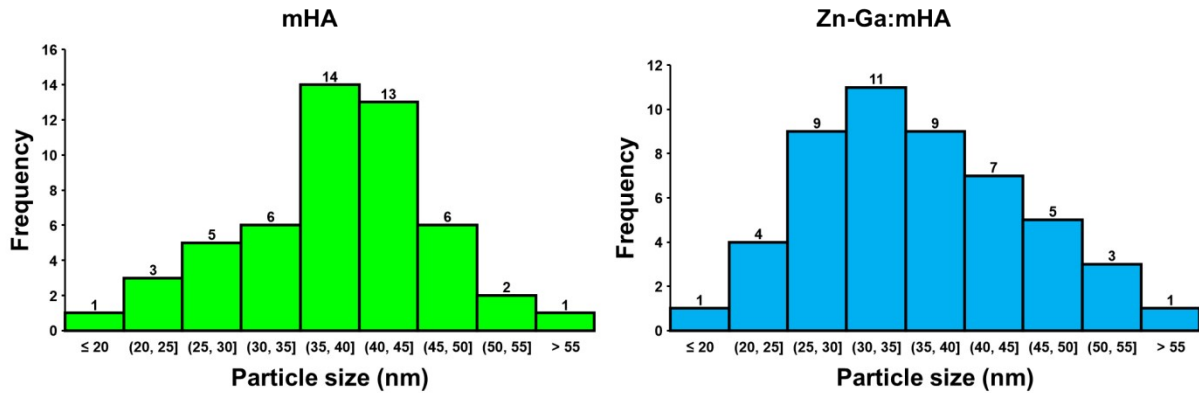

Figure S3. Particle size distribution diagram of mHA and Zn-Ga:mHA nanoparticles from FESEM images.

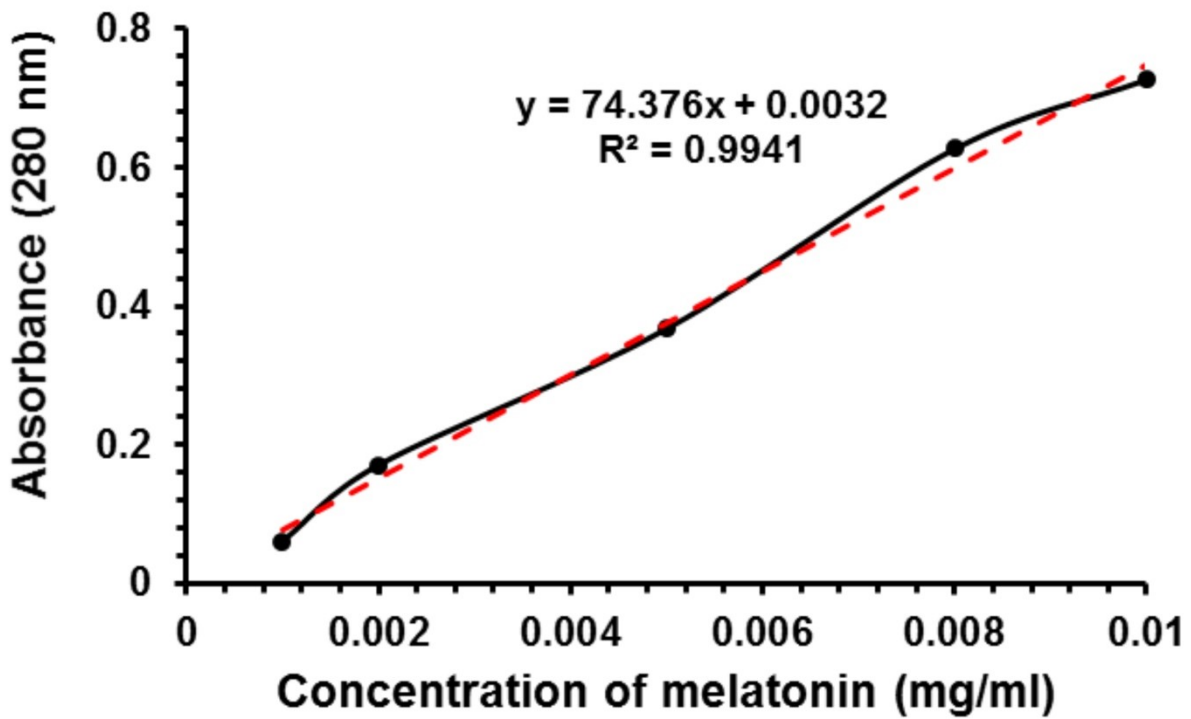

Figure S4. The calibration curve of melatonin at 280 nm in PBS at 37 °C.

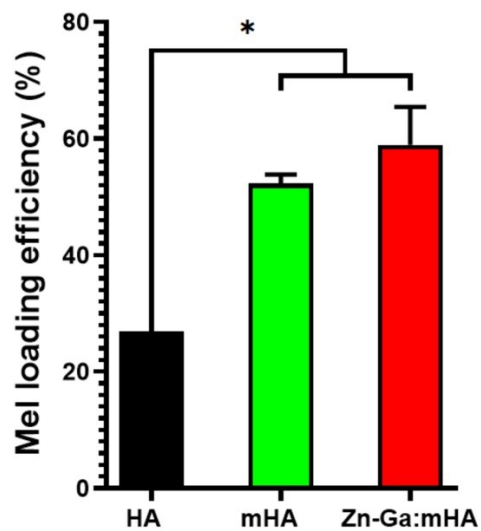

**Figure S5.** The loading efficiency of Mel in mHA and Zn-Ga:mHA nanoparticles (\*:P < 0.05)

**Table S2.** The results of N<sub>2</sub> absorption and desorption test (BET): specific surface area S<sub>BET</sub>, volume of holes V<sub>p</sub> and size of holes D<sub>p</sub>.

| Samples   | S <sub>BET</sub> (m <sup>2</sup> ·g <sup>-1</sup> ) | V <sub>p</sub> (cm <sup>3</sup> ·g <sup>-1</sup> ) | D <sub>p</sub> (nm) |
|-----------|-----------------------------------------------------|----------------------------------------------------|---------------------|
| HA        | 4.651±0.4                                           | 0.055±0.01                                         | -                   |
| mHA       | 7.345±0.27                                          | 0.063±0.01                                         | 10.65±0.2           |
| Zn-Ga:mHA | 15.558±0.4                                          | 0.144±0.02                                         | 10.61±0.4           |
